# Supplementary material for: Association mining of mutated cancer genes in different clinical stages across 11 cancer types
Source: PubMed Central journal article supplement (PMC5356553; doi:10.18632/oncotarget.11392), 2016-08-19
Supplement: oncotarget-07-68270-s001.pdf [file oncotarget-07-68270-s001.pdf]

## **Association mining of mutated cancer genes in different clinical stages across 11 cancer types**

### **SUPPLEMENTARY TABLES**

**Supplementary Table S1: FMGS identified in 11 cancer types.**

**See Supplementary File 1**

**Supplementary Table S2: Association rules generated in CRC, HNSC, LIHC, LUAD, SKCM, STAD, UCEC.**

**See Supplementary File 2**
